# Supplementary material
Source: Royal Society of Chemistry journal article supplement (doi:10.1039/d6tb00128a)
Supplement: d6tb00128a1.pdf [file d6tb00128a1.pdf]

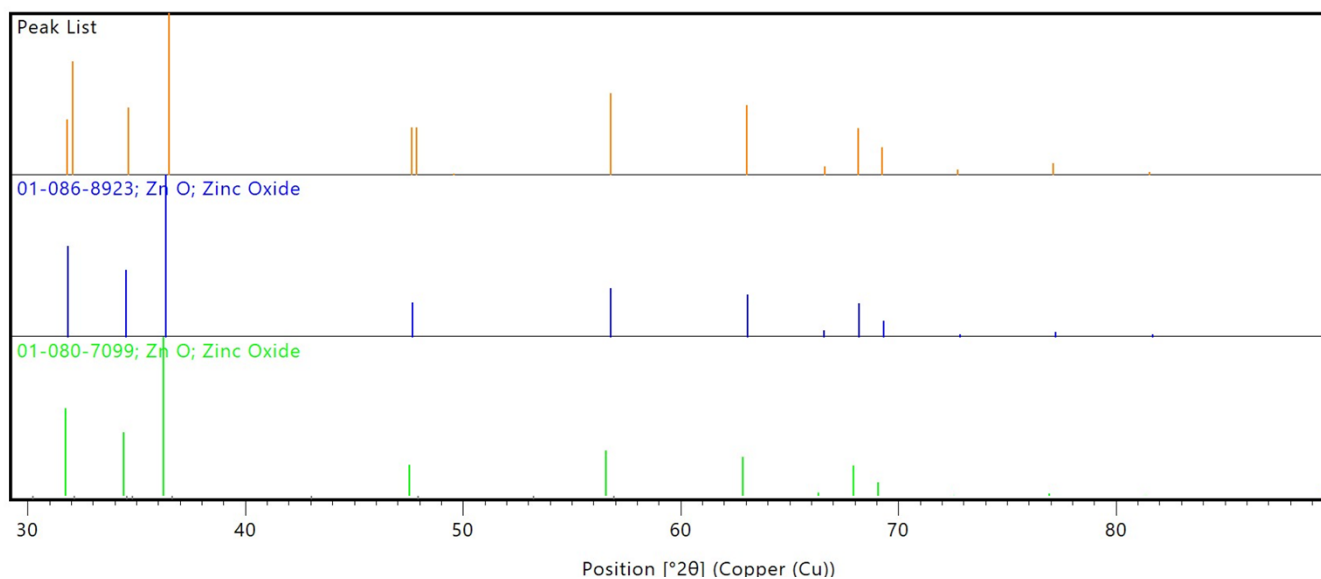

**Figure S1.** XRD peak comparison between synthesized ZnO nanorods and standard reference patterns (PDF 01-086-8923 and 01-080-7099).

**Table S1.** Comparison of experimental XRD reflections of ZnO nanorods with PDF reference: : 01-086-923 (ZnO, wurtzite)

| Plane (hkl) | 2θ (PDF) (°) | d (PDF) (Å) | 2θ (Exp.) (°) | d (Exp.) (Å) | Δ2θ (°) |
|-------------|--------------|-------------|---------------|--------------|---------|
| (100)       | 31.868       | 2.8059      | 31.86         | 2.807        | -0.01   |
| (002)       | 34.536       | 2.5950      | 34.52         | 2.598        | -0.02   |
| (101)       | 36.369       | 2.4683      | 36.36         | 2.471        | -0.01   |
| (102)       | 47.698       | 1.9052      | 47.69         | 1.907        | -0.01   |
| (110)       | 56.783       | 1.6200      | 56.77         | 1.622        | -0.01   |
| (103)       | 63.079       | 1.4726      | 63.06         | 1.475        | -0.02   |
| (200)       | 66.604       | 1.4030      | 66.59         | 1.405        | -0.01   |
| (112)       | 68.187       | 1.3742      | 68.17         | 1.376        | -0.02   |
| (201)       | 69.327       | 1.3544      | 69.31         | 1.356        | -0.02   |
| (004)       | 72.837       | 1.2975      | 72.82         | 1.299        | -0.02   |

**Table S2.**TC results (using 6 main reflections) of ZnO nanorods

| (hkl) | I <sub>0</sub> (PDF ref.: 01-086-923)<br>(%) | TC          |
|-------|----------------------------------------------|-------------|
| (100) | 56.0                                         | <b>1.11</b> |
| (002) | 41.0                                         | <b>0.61</b> |
| (101) | 100.0                                        | <b>0.60</b> |
| (102) | 21.2                                         | <b>1.66</b> |
| (110) | 29.7                                         | <b>1.02</b> |
| (103) | 25.8                                         | <b>1.00</b> |

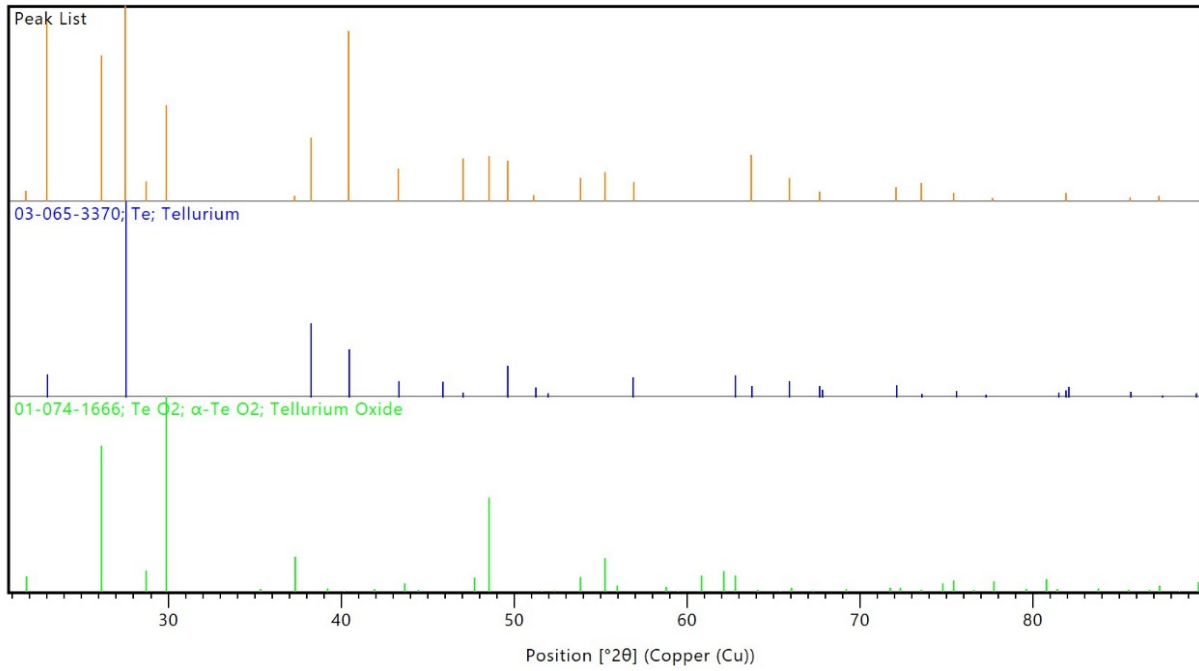

**Figure S2.** XRD peak line comparison between synthesized TeO<sub>2</sub>/Te nanosheets peak list (orange) and standard reference patterns Te (PDF 01-078-2312) and TeO<sub>2</sub> (PDF 01-080-7099) reference cards.

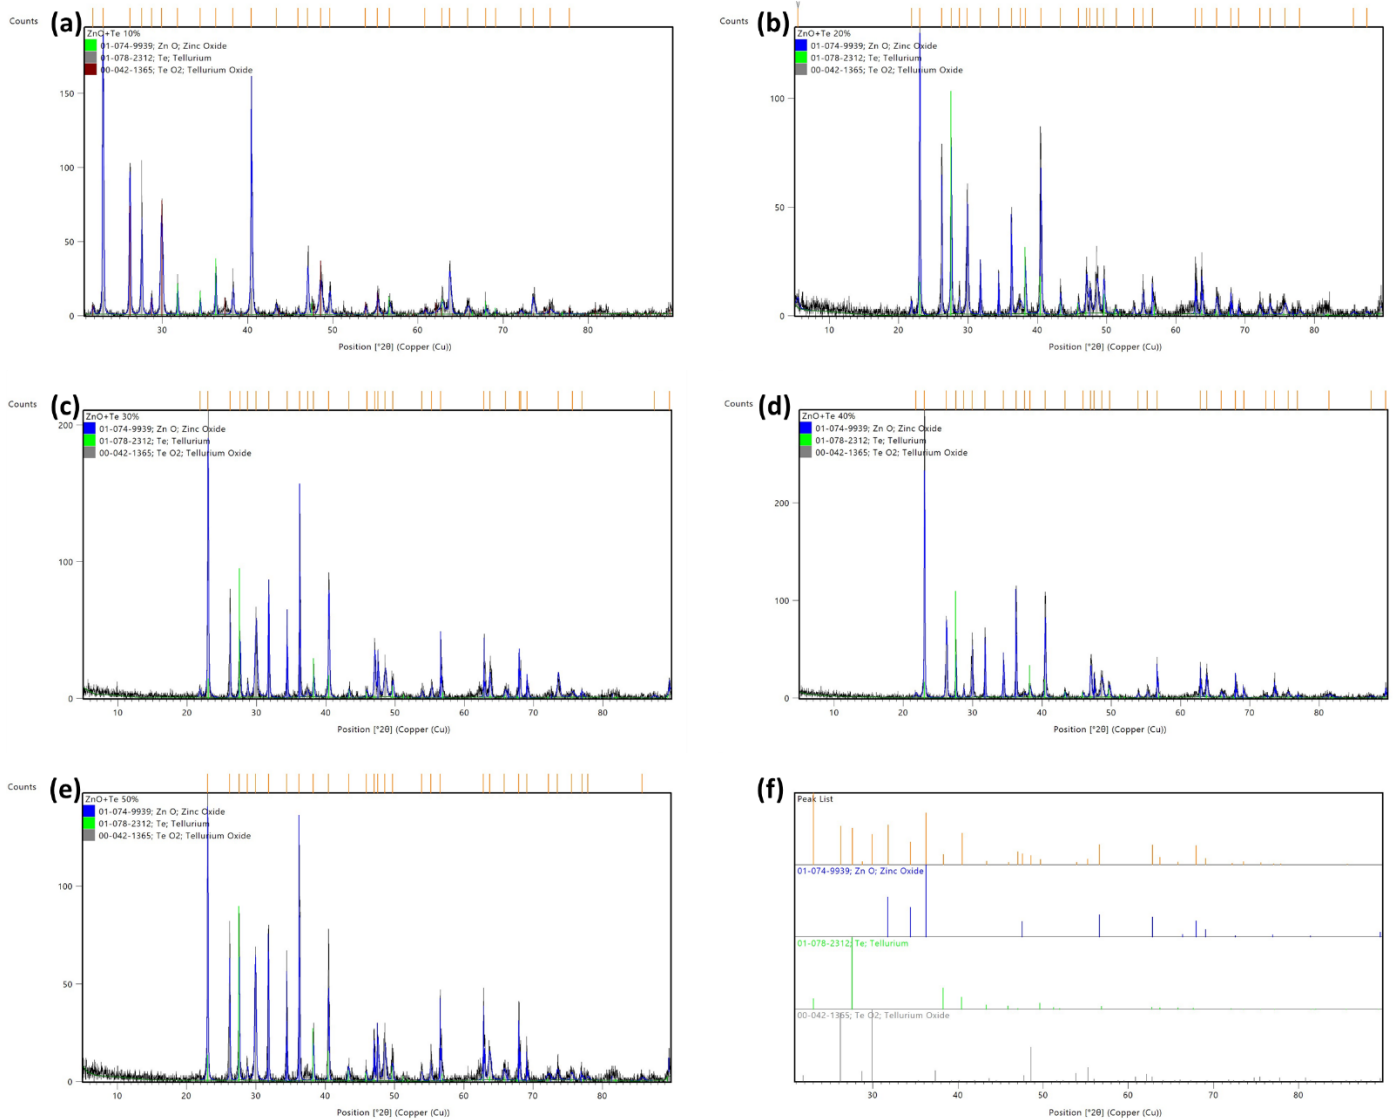

**Figure S3.** XRD peak matching of the ZnO-decorated Te/ $\alpha$ -TeO<sub>2</sub> nanosheets at different ZnO loadings: (a) Z2 (10% ZnO/TeO<sub>2</sub>/Te), (b) Z3 (20% ZnO/TeO<sub>2</sub>/Te), (c) Z4 (30% ZnO/TeO<sub>2</sub>/Te), (d) Z5 (40% ZnO/TeO<sub>2</sub>/Te), and (e) Z6 (50% ZnO/TeO<sub>2</sub>/Te), showing the evolution of characteristic ZnO, Te, and  $\alpha$ -TeO<sub>2</sub> reflections with increasing ZnO content. Panel (f) compares the experimental XRD peak positions of the Te/ $\alpha$ -TeO<sub>2</sub> nanosheets with the corresponding standard PDF reference patterns, confirming accurate phase assignment and crystallographic consistency.

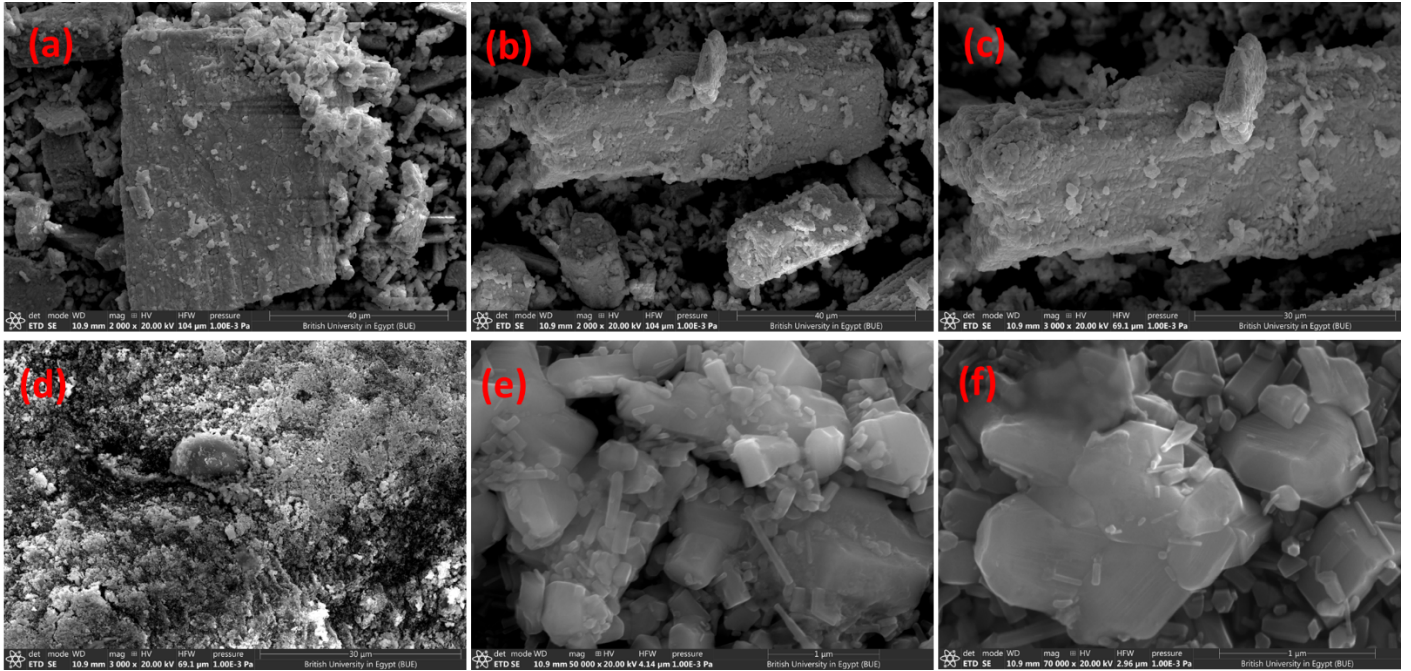

**Fig. S4.** FE-SEM images of the raw materials: Te (a–c) and ZnO (d–f) at different magnifications.
